# Supplementary material for: Uncoupling Foam Fractionation and Foam Adsorption for Enhanced Biosurfactant Synthesis and Recovery
Source: MDPI journal article supplement (doi:10.3390/microorganisms8122029), 2020-12-18

# Uncoupling Foam Fractionation and Foam Adsorption for Enhanced Biosurfactant Synthesis and Recovery

Christian C. Blesken <sup>1</sup>, Tessa Strümpfler <sup>1</sup>, Till Tiso <sup>1,\*</sup> and Lars M. Blank <sup>1,\*</sup>

<sup>1</sup> iAMB - Institute of Applied Microbiology, ABBt - Aachen Biology and Biotechnology, RWTH Aachen University, Aachen, Germany

\* Correspondence: till.tiso@rwth-aachen.de & lars.blank@rwth-aachen.de; Tel.: +49-241-8026601

Received: date; Accepted: date; Published: 18 December 2020

## 1. Supplementary tables

### 1.1. Process parameters of the fermentation setup and procedure

**Table S1.** Bioreactor and foam fractionation process parameters at a 2 L bioreactor working volume

| Process parameter                           | Value                    |
|---------------------------------------------|--------------------------|
| Total vessel volume                         | 3 L                      |
| Stirring speed                              | 500 rpm                  |
| Temperature                                 | 30°C                     |
| Reactor sparger pore size                   | 20 µm                    |
| Reactor sparger surface area                | 19.4 cm <sup>2</sup>     |
| Foam centrifuge rotation speed              | 4000 rpm                 |
| Pump rate of foamate reflux                 | 265 mL/min               |
| Pump rate of drainage reflux                | 17 mL/min                |
| Fractionation column sparger pore size      | 20 µm                    |
| Fractionation column sparger surface area   | 7.1 cm <sup>2</sup>      |
| Added 50% (w/v) glucose sol. per feed pulse | 14 g (i.e., 6 g glucose) |

**Table S2.** Alternating adsorption, desorption and regeneration procedure for the adsorption columns with a packed bed of 30 g C<sub>18</sub> silica-based ODS-A, for continuous product separation at a 2 L bioreactor working volume.

| Column status              | Duration | Volume flow | V <sub>pumped liquid</sub> / V <sub>adsorbent</sub> |
|----------------------------|----------|-------------|-----------------------------------------------------|
| Adsorption                 | 8 h      |             |                                                     |
| Blow with air <sup>1</sup> | 2 min    | 0.5 L/min   |                                                     |
| Flush with water           | 10 min   | 10 mL/min   | 1.8                                                 |
| Blow with air <sup>1</sup> | 2 min    | 0.5 L/min   |                                                     |
| Desorption with ethanol    | 1 h      | 8 mL/min    | 8.5                                                 |
| Blow with air <sup>1</sup> | 2 min    | 0.5 L/min   |                                                     |
| Desorption with methanol   | 1 h      | 8 mL/min    | 8.5                                                 |
| Blow with air <sup>1</sup> | 2 min    | 0.5 L/min   |                                                     |
| Flush with water           | 10 min   | 10 mL/min   | 1.8                                                 |
| Blow with air <sup>1</sup> | 2 min    | 0.5 L/min   |                                                     |

<sup>1</sup>) At 0.5 bar overpressure

**Table S3.** Bioreactor and foam fractionation process parameters at a 9 L bioreactor working volume that deviate from the bioreactor process in a 2 L working volume.

| Process parameter                           | Value/ type               |
|---------------------------------------------|---------------------------|
| Total vessel volume                         | 13 L                      |
| Reactor sparger                             | Ring sparger <sup>1</sup> |
| Added 50% (w/v) glucose sol. per feed pulse | 90 g (i.e., 38 g glucose) |

<sup>1</sup>) As provided for this vessel by Eppendorf AG, Hamburg, Germany

**Table S4.** Alternating adsorption-, desorption- and regeneration procedure for the adsorption columns with a packed bed of 60 g C<sub>18</sub> silica-based ODS-A, for continuous product separation at a 9 L bioreactor working volume.

| Column status                                                       | Duration | Volume flow | V <sub>pumped liquid</sub> / V <sub>adsorbent</sub> |
|---------------------------------------------------------------------|----------|-------------|-----------------------------------------------------|
| Adsorption                                                          | 8 h      |             |                                                     |
| Blow with air <sup>1</sup>                                          | 2 min    | 0.5 L/min   |                                                     |
| Flush with water                                                    | 10 min   | 10 mL/min   | 0.9                                                 |
| Blow with air <sup>1</sup>                                          | 2 min    | 0.5 L/min   |                                                     |
| Desorption with ethanol                                             | 2 h      | 8 mL/min    | 8.5                                                 |
| Blow with air <sup>1</sup>                                          | 2 min    | 0.5 L/min   |                                                     |
| Flush with water                                                    | 10 min   | 10 mL/min   | 0.9                                                 |
| Blow with air <sup>1</sup>                                          | 2 min    | 0.5 L/min   |                                                     |
| Final desorption step after 2 <sup>nd</sup> desorption with ethanol |          |             |                                                     |
| Desorption with methanol                                            | 30 min   | 8 mL/min    | 2.1                                                 |
| Blow with air <sup>1</sup>                                          | 2 min    | 0.5 L/min   |                                                     |

<sup>1</sup>) At 0.5 bar overpressure

## 2. Supplementary figures

### 2.1. Supplementary figures

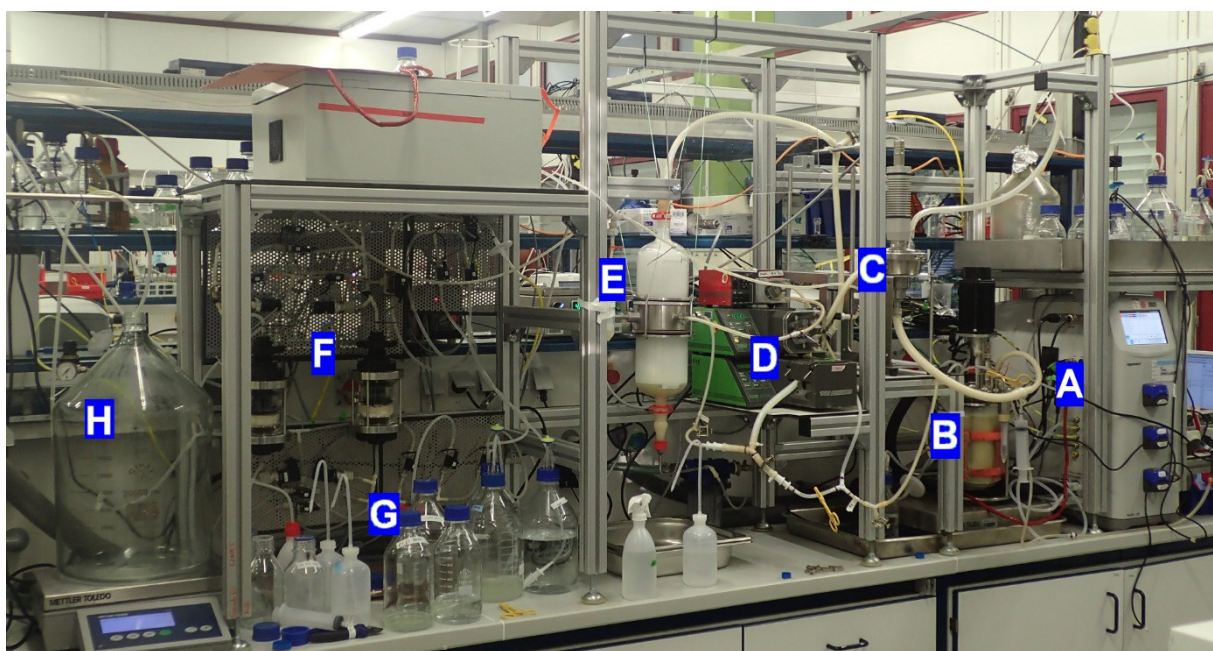

**Figure S1.** Picture of fermentation setup. The BioFlo 120 bioreactor system, including a control unit (A) and the bioreactor itself (B), was applied for microbial biosurfactant synthesis. The foam was discharged through the reactor exhaust to a foam centrifuge (C) to separate offgas and foamate. The foamate was pumped (D) into the foam fractionation column (E). The fractionated foam was led to an automated adsorption unit (F). Non-adsorbed substances were collected as permeate (H). At product desorption, the eluate was collected separately (G).

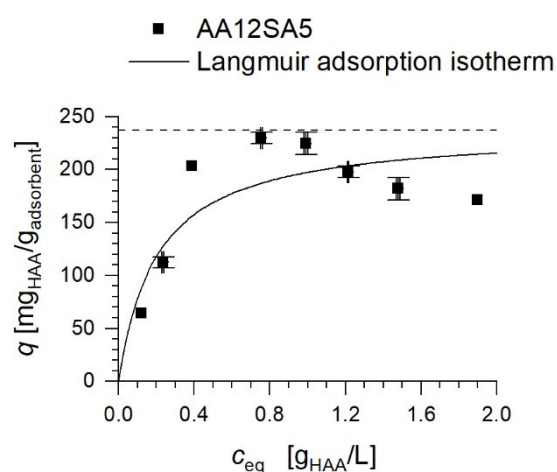

**Figure S2.** Determination of the maximum HAA adsorption capacity with Octadecylsilyl-A AA12SA5 as adsorbent. Adsorbed HAA per quantity of adsorbent ( $q$ , black squares) vs. HAA concentration in the supernatant ( $C_{eq}$ ). Langmuir adsorption isotherm fit (black line) with a maximum adsorption capacity of  $q_{max} = 237 \text{ mg}_{HAA}/g_{adsorbent}$  (dashed line). The error bars indicate the deviation from the mean of two replicates.

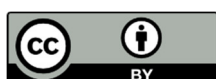

Supplement: s1 [file s1]
